# Supplementary material
Source: Springer Nature journal article supplement (https://www.springermedizin.de/resource/supplementary/12936_2013_3713_MOESM3_ESM.pdf/9545178)

Normal liver

Malaria without hyperbilirubinemia

Malaria with hyperbilirubinemia

Cleaved caspase-3

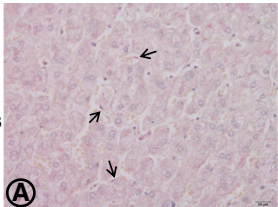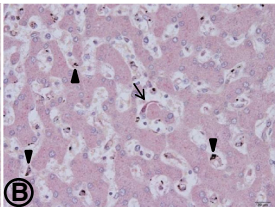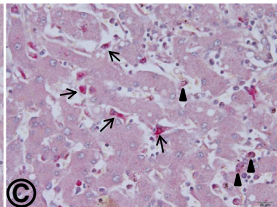

NF- $\kappa$ B p65

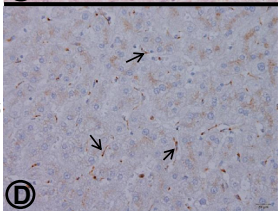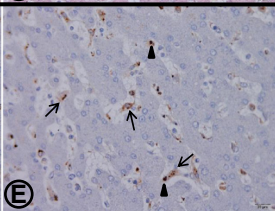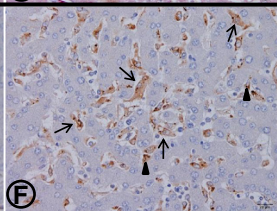

Supplement: MOESM3 [file 9545178]
